# Supplementary material
Source: PubMed Central journal article supplement (PMC7580016)
Supplement: NIHMS1634199-supplement-1.pdf [file NIHMS1634199-supplement-1.pdf]

## SUPPLEMENTARY FIGURES

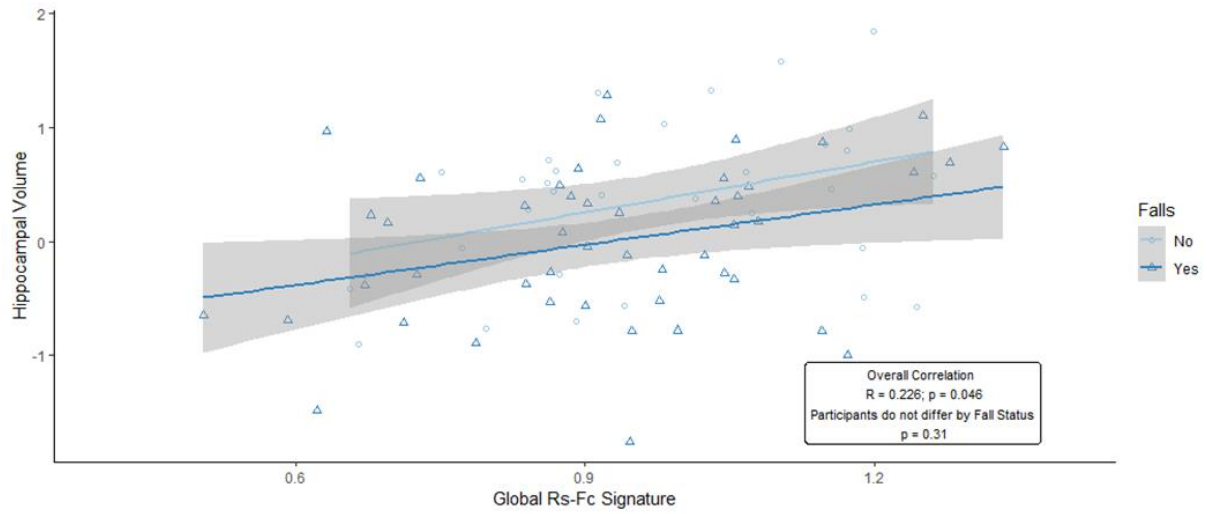

**Supplementary Figure 1.** Global rs-fc intra-network signature is correlated with hippocampal volume in both individuals who fell and those who did not fall.
